# Supplementary material for: Mitochondrial Proteomics of Antimony and Miltefosine Resistant Leishmania infantum
Source: MDPI journal article supplement (doi:10.3390/proteomes3040328), 2015-10-21
Supplement: s1 [file s1]

## Supplementary Materials

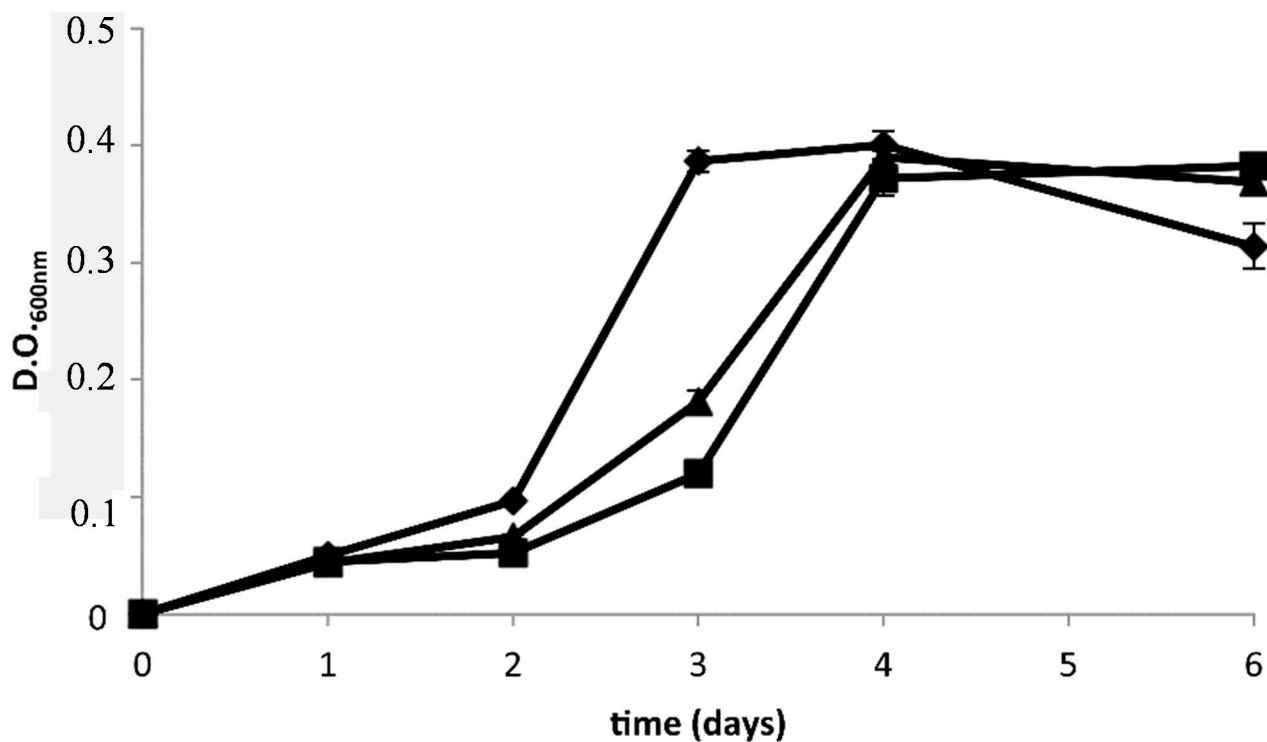

**Figure S1.** Growth curves for wild-type, MF200 and SbIII2000.2 cell lines. Cell growth was monitored by measuring the absorbance of culture aliquots at 600<sub>nm</sub> in a multiwell scanning spectrophotometer. JPCM5 wild-type strain (♦); JPCM5 miltefosine resistant mutant MF200, clone 3 (■); JPCM5 SbIII resistant mutant Sb2000.2, clone 3 (▲). Growth curves were performed in triplicate.

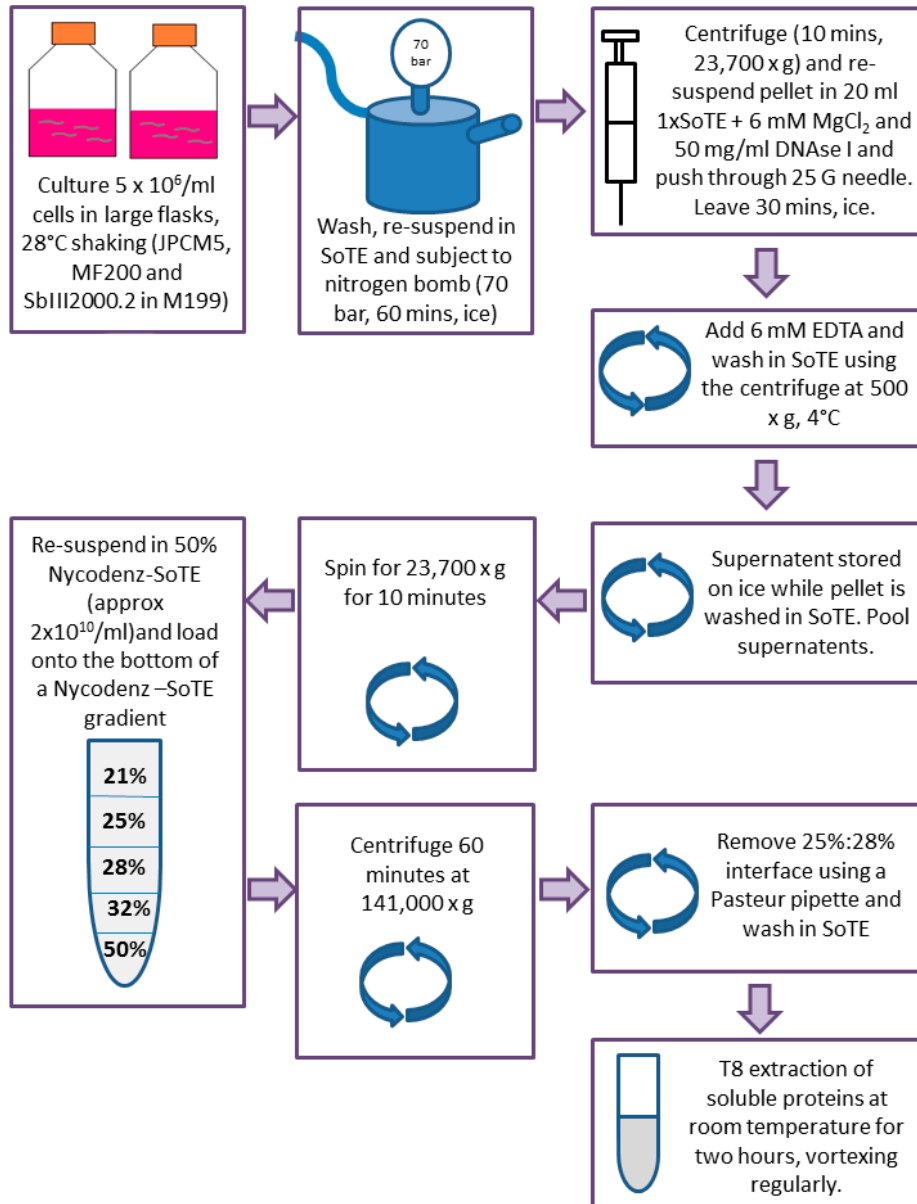

**Figure S2.** Mitochondrial enrichment procedure. The main steps including buffers and conditions to reproduce this experiment were included.
